# Supplementary material for: RRM2 enhances MYCN-driven neuroblastoma formation and acts as a synergistic target with CHK1 inhibition
Source: PubMed Central journal article supplement — Sci Adv. 2022 Jul 13;8(28):eabn1382. doi: 10.1126/sciadv.abn1382 (PMC9278860; doi:10.1126/sciadv.abn1382), 2022-07-13
Supplement: sciadv.abn1382_sm.pdf [file sciadv.abn1382_sm.pdf]

Supplementary Materials for  
**RRM2 enhances MYCN-driven neuroblastoma formation and acts as a synergistic target with CHK1 inhibition**

Carolina Nunes *et al.*

Corresponding author: Kaat Durinck, [kaat.durinck@ugent.be](mailto:kaat.durinck@ugent.be)

*Sci. Adv.* **8**, eabn1382 (2022)  
DOI: 10.1126/sciadv.abn1382

**This PDF file includes:**

Figs. S1 to S5  
Tables S1 to S9

**A**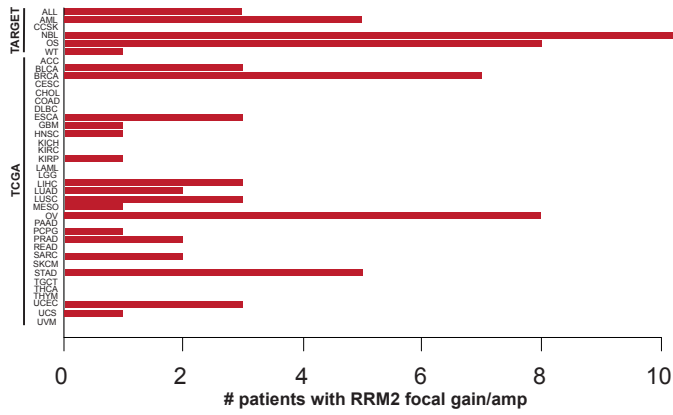**B**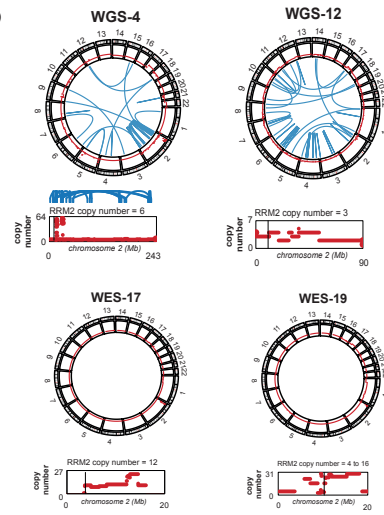**C**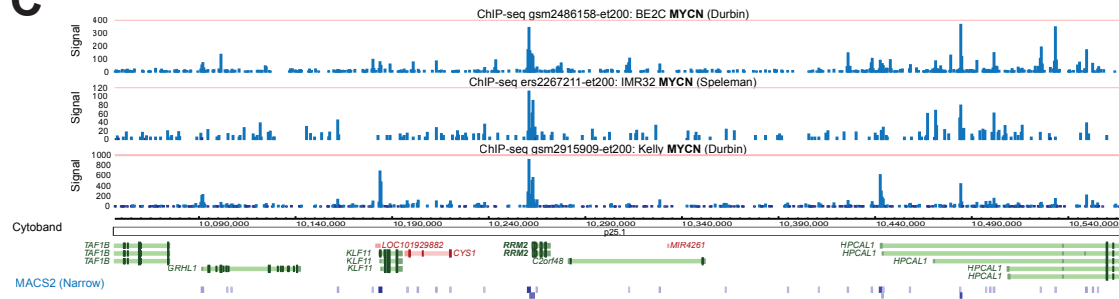**D**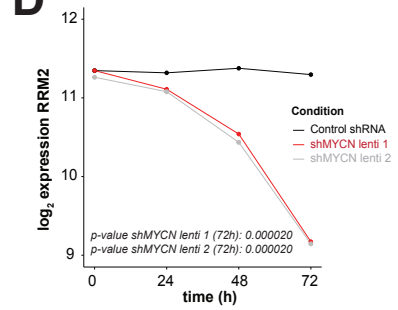**E**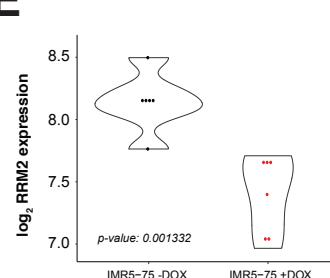**F**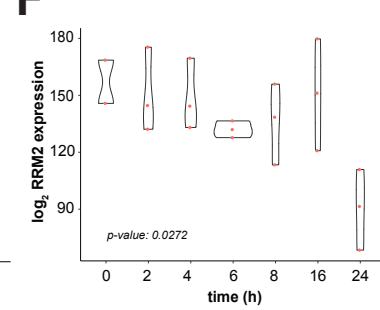**G**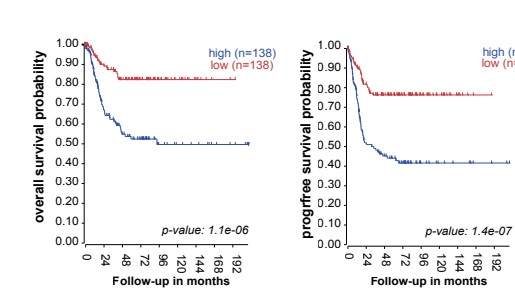**H**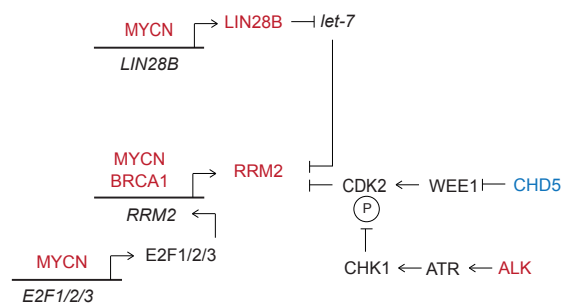

**Supp. Fig. 1: High *RRM2* expression is a poor prognostic factor in neuroblastoma.** **A.** Bar plot indicating the number of neuroblastoma patients in the TCGA or TARGET cohorts with a focal *RRM2* gain or amplification; **B.** Additional whole genome or whole exome sequencing arrayCGH data of another cohort of 419 neuroblastoma cases uncovers the identification of 60 cases with *RRM2* gain or amplification (*top*), with detailed CNV profiles of some complex amplicons in which *RRM2* is involved, including WGS-12 with noted chromotrypsis of 2p involving the *RRM2* locus (*bottom*); **C.** Publicly available MYCN ChIP-seq data shows MYCN binding at the promotor region of the *RRM2* locus (hgserver2.amc.nl); **D.** *RRM2* expression is downregulated upon shRNA mediated MYCN knockdown in IMR32 neuroblastoma cells; **E.** *RRM2* expression is downregulated following doxycyclin inducible MYCN downregulation in IMR5-75 neuroblastoma cells; **F.** *RRM2* overexpression is reduced over time upon inducible MYCN downregulation in SHEP21N neuroblastoma cells; **G.** Overall and event-free patient survival for neuroblastoma cases with high versus low *RRM2* expression in 2 other independent patient cohorts (respectively Kocak (n=649) and SEQC (n=498) cohorts, hgserver2.amc.nl); **H.** Scheme depicting *RRM2* at the nexus of a copy number driven regulatory network in neuroblastoma (*red*: gene is gained or amplified in neuroblastoma, *blue*: gene displays copy number loss in neuroblastoma).

**A**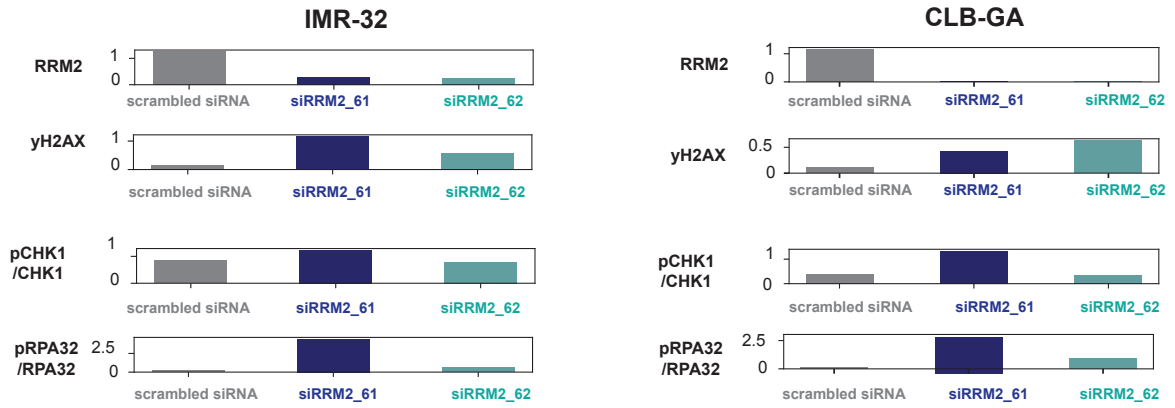**B**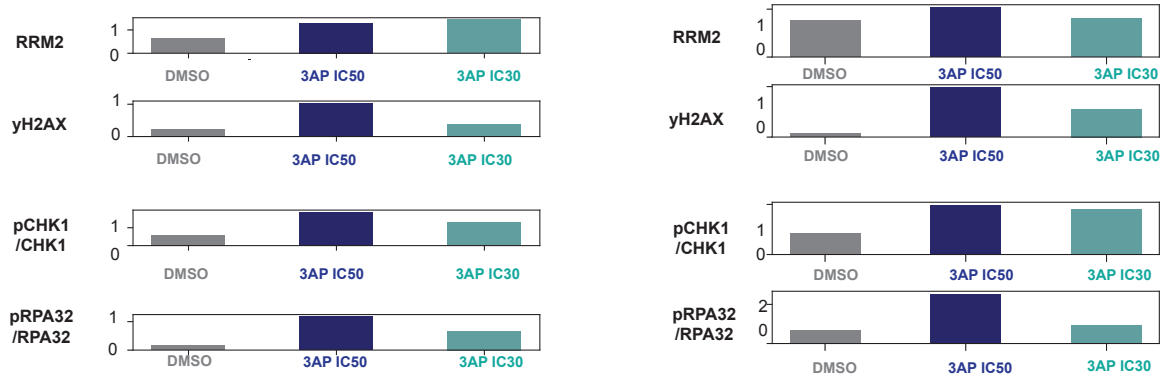**C**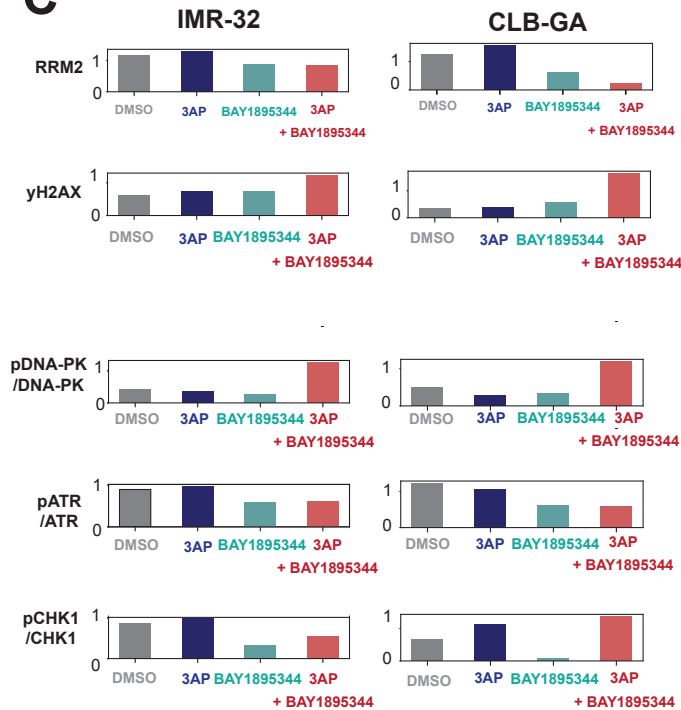**D**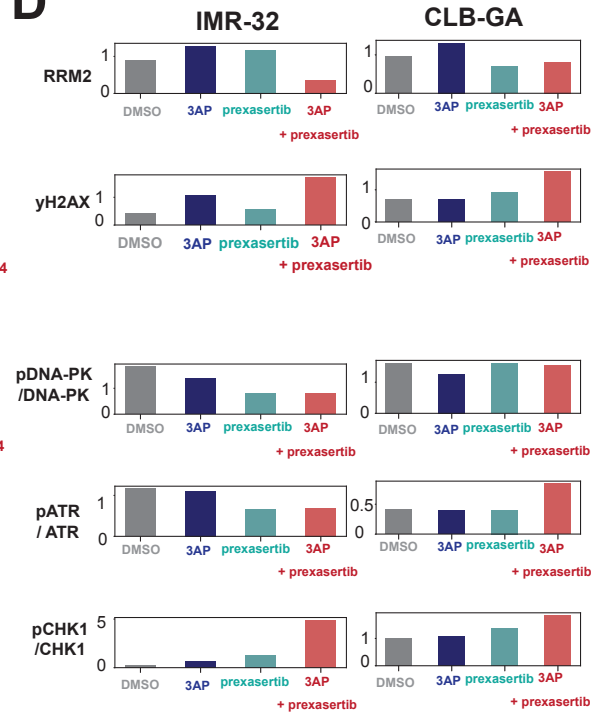

**Supp. Fig. 2: Quantification of immunoblotting images throughout the manuscript. A.** Quantification of immunoblotting for RRM2,  $\gamma$ H2AX, CHK1/pCHK1 and RPA32/pRPA32 following transient knockdown of RRM2 by two independent siRNAs in IMR-32 and CLB-GA neuroblastoma cells; **B.** Quantification of immunoblotting for RRM2,  $\gamma$ H2AX, CHK1/pCHK1 and RPA32/pRPA32 following exposure to 3AP for 48h at respective IC30 and IC50 concentrations for IMR-32 and CLB-GA cells; **C.** Quantification of immunoblotting for RRM2,  $\gamma$ H2AX, DNA-PK/pDNA-PK, ATR/pATR and CHK1/pCHK1 in IMR-32 and CLB-GA neuroblastoma cells following combined 3AP-BAY1895344 treatment in comparison to single agent exposure or control treatment (DMSO); **D.** Quantification of immunoblotting for RRM2,  $\gamma$ H2AX, DNA-PK/pDNA-PK, ATR/pATR and CHK1/pCHK1 in IMR-32 and CLB-GA neuroblastoma cells following combined 3AP-prexasertib treatment in comparison to single agent exposure or control treatment (DMSO); All images were quantified by ImageJ and bar plots were normalized relative to vinculin levels.

**A**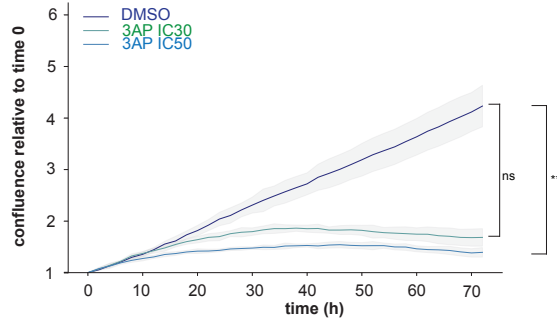**B**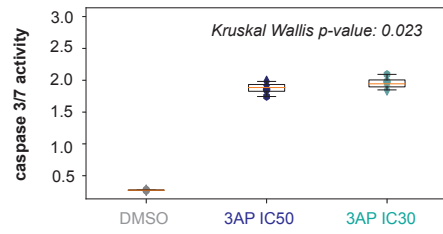**C**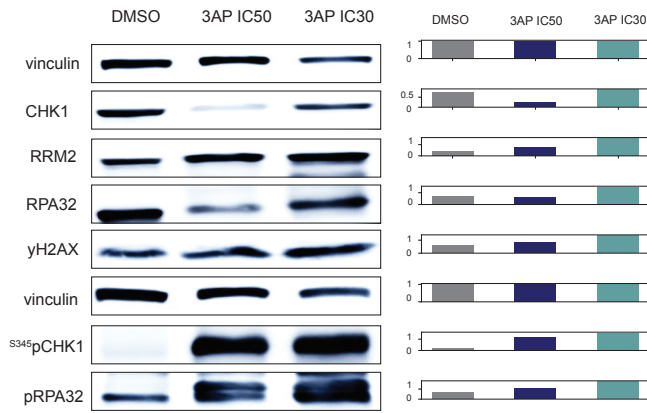**D**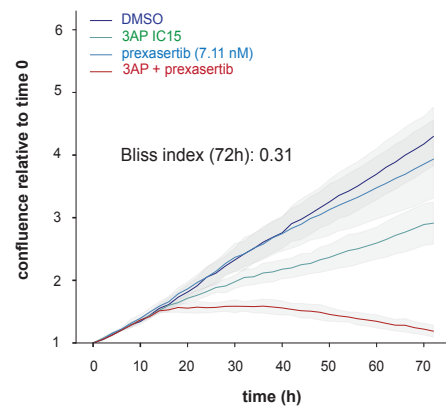**E**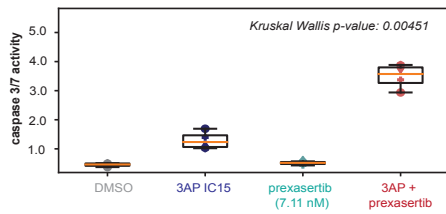**F**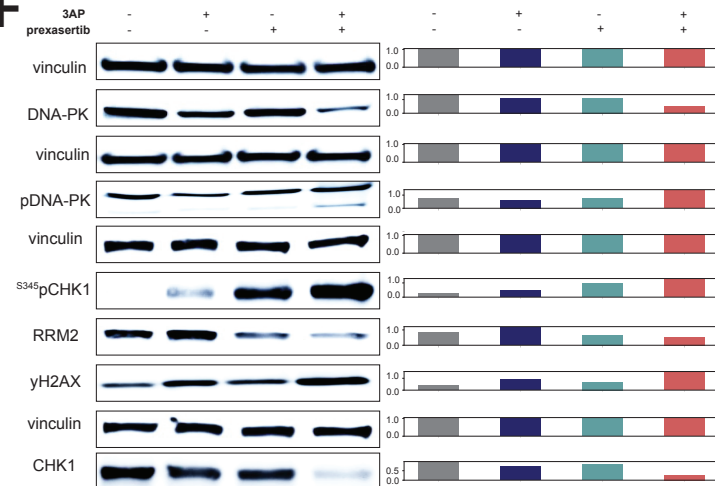

**Supp. Fig. 3: Combined RRM2-CHK1 pharmacological inhibition acts synergistically in the p53 mutant neuroblastoma cell line SK-N-BE(2)-C: (A)** Cell confluence of SK-N-BE(2)-C cells is reduced following 3AP single drug treatment, both with IC30 and IC50 concentrations; **(B)** 3AP exposure significantly induces cell death as measured by the Caspase glo assay (Promega); **(C)** Immunoblotting following 3AP treatment of SK-N-BE(2)-C cells with 3AP shows upregulated <sup>S345</sup>pCHK1 and pRPA32 levels. In addition total CHK1 levels are downregulated following 3AP exposure at IC50 concentration; **(D)** Exposure of SKN-BE(2)-C cells to 3AP-prexasertib combination treatment shows a synergistic negative effect on cell confluence as measured by Incucyte live cell imaging; **(E)** Combined 3AP-prexasertib treatment of SK-N-BE(2)-C cells significantly induces cell death compared to control or (low dose) single treatments; **(F)** Immunoblotting following combined 3AP-prexasertib treatment shows upregulation of <sup>S345</sup>pCHK1 and  $\gamma$ H2AX levels, concomitant with a reduction of RRM2 and total CHK1 protein levels.

**A**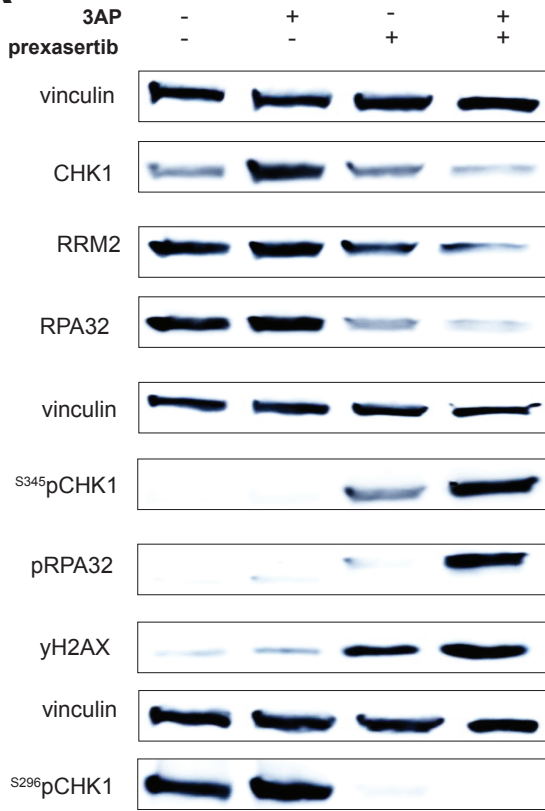**B**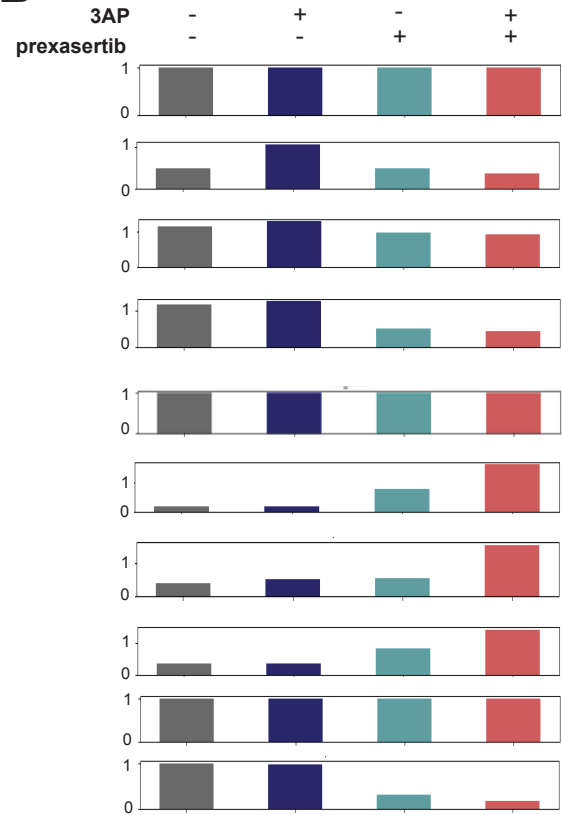**C**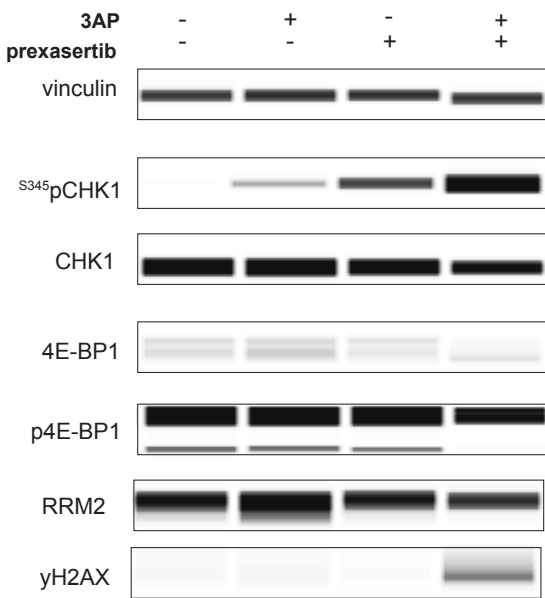**D**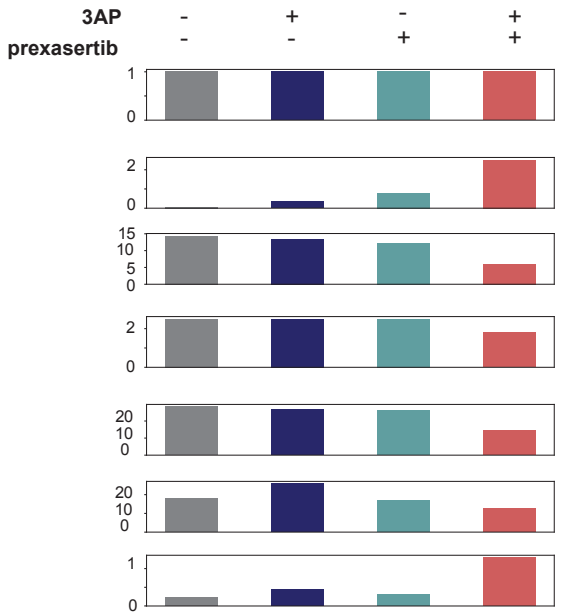



**Supp Fig. 4: Combined 3AP-prexasertib treatment reduced pCHK1 autophosphorylation and p4E-BP1 levels.** (A) IMR32 cells treated with 3AP-prexasertib combination display reduced <sup>S296</sup>pCHK1 autophosphorylation concomitant with reduced <sup>S345</sup>pCHK1 and reduced total CHK1 as well as RRM2 protein levels compared to control or single drug treatment; (B) Quantification of the immunoblotting relative to vinculin as presented in (A); (C) Reduced p4E-BP1 levels (activation) upon 3AP-prexasertib combination treatment is marked by the disappearing lower p4E-BP1 band; (D) Quantification of the immunoblotting relative to vinculin as presented in (C)

**A**

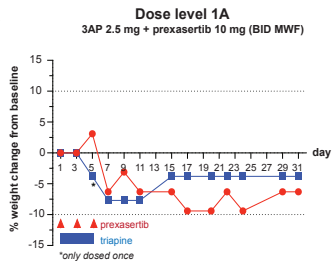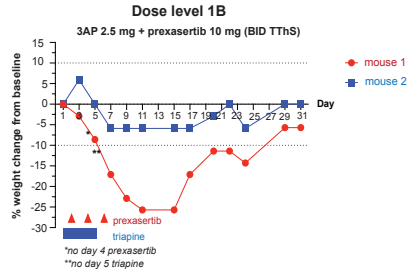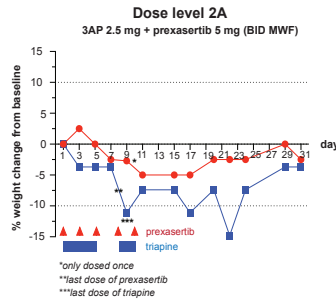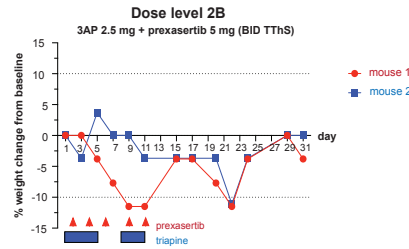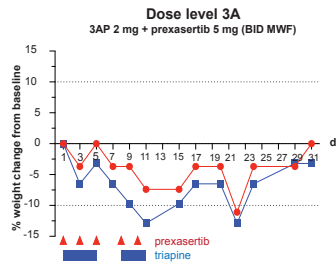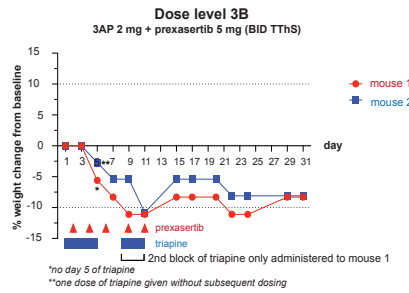

**B**

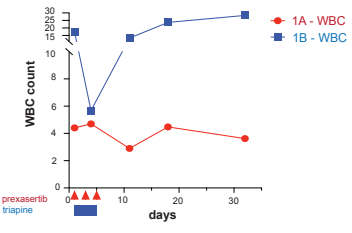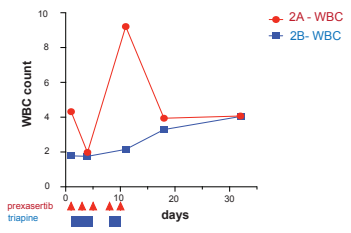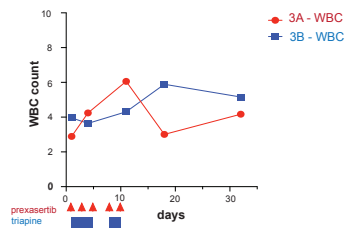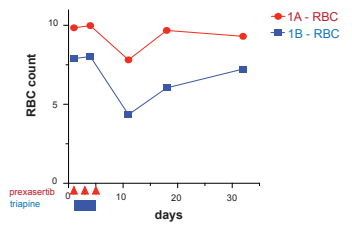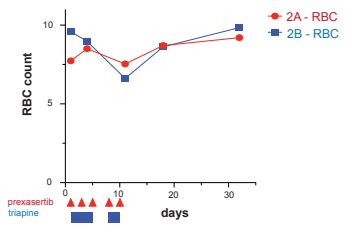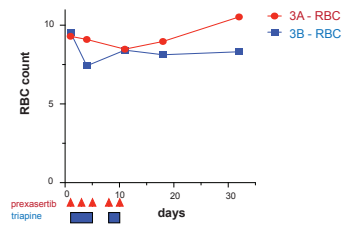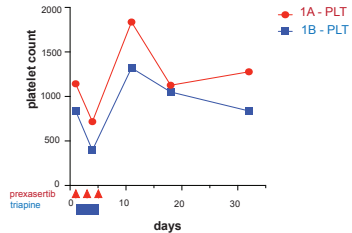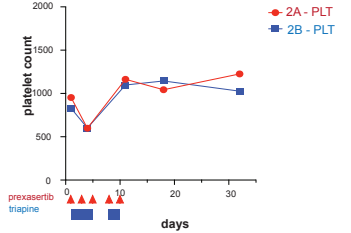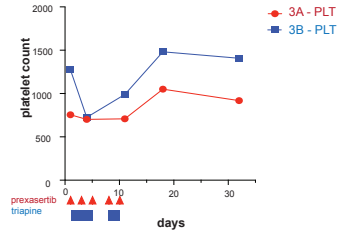

**Supp. Fig. 5: Evaluation of the impact of combined 3AP-prexasertib treatment in NGS mice on weight of the mice and hematopoietic toxicity. (A)** No mortality was observed for any of the dose levels tested. Significant weight loss was observed in treated animals at the highest dose level 1 (i.e., triapine 2.5 mg/kg + prexasertib 10 mg/kg) and treatment was only tolerated for 1 week due to severe weight loss and poor clinical appearance. In contrast, animals treated at dose level 2 and dose level 3 had few to no dosing holidays and were tolerated for nearly 2 treatment cycles; **(B)** Serial blood count measurements were performed and show treatment-associated anemia and thrombocytopenia, but with consequent recovery.

**Table S1.**

| <b>-log<sub>10</sub><br/>(adj.p)</b> | <b>log<sub>2</sub>(FC)</b> | <b>protein names</b> |
|--------------------------------------|----------------------------|----------------------|
| 2.85                                 | -3.90                      | RPS29                |
| 3.34                                 | -2.82                      | HMGB2                |
| 2.94                                 | -2.08                      | QIL1                 |
| 2.41                                 | -1.97                      | HEXIM1               |
| 1.43                                 | -1.91                      | KRR1                 |
| 1.33                                 | -1.89                      | ZC3H4                |
| 4.40                                 | -1.85                      | ZNF593               |
| 1.28                                 | -1.83                      | CSNK2B               |
| 4.12                                 | -1.79                      | RBM42                |
| 2.45                                 | -1.65                      | MRPS2                |
| 1.54                                 | -1.60                      | MLLT1                |
| 1.50                                 | -1.58                      | PPIB                 |
| 1.02                                 | -1.37                      | EMG1                 |
| 1.33                                 | -1.34                      | TMPO                 |
| 1.91                                 | -1.28                      | DDX39B               |
| 1.61                                 | -1.23                      | KPNA1                |
| 1.30                                 | -1.04                      | TSR1                 |
| 1.10                                 | -1.02                      | RFC4                 |
| 1.59                                 | -0.98                      | PPIH                 |
| 1.13                                 | -0.97                      | SRRT                 |
| 1.97                                 | -0.96                      | WBP11                |
| 1.18                                 | -0.86                      | EHMT1                |
| 1.47                                 | -0.85                      | NME4                 |
| 1.08                                 | -0.78                      | ASH2L                |
| 3.37                                 | -0.76                      | MBD3                 |
| 4.88                                 | -0.72                      | PHAX                 |
| 1.52                                 | -0.68                      | PA2G4                |
| 2.71                                 | -0.63                      | DEK                  |
| 2.14                                 | -0.63                      | VARS                 |
| 2.65                                 | -0.57                      | CTCF                 |
| 2.24                                 | -0.56                      | NOL4                 |
| 1.23                                 | -0.54                      | CIRBP                |
| 1.27                                 | -0.54                      | MORF4L2              |
| 1.32                                 | -0.52                      | MORF4L1              |
| 2.94                                 | -0.52                      | CDK2AP1;CDK2AP2      |

|      |       |               |
|------|-------|---------------|
| 2.91 | -0.52 | TOP1          |
| 2.43 | -0.52 | PAF1          |
| 2.32 | -0.48 | SRP9          |
| 3.92 | -0.48 | MTDH          |
| 3.49 | -0.48 | RBBP5         |
| 4.23 | -0.48 | BOD1L1        |
| 2.42 | -0.47 | SART3         |
| 1.70 | -0.47 | C3orf17       |
| 2.05 | -0.47 | CTR9          |
| 2.47 | -0.46 | HDGFRP2       |
| 2.21 | -0.46 | SNRPD2        |
| 2.54 | -0.46 | ZC3H11A       |
| 2.45 | -0.46 | XRCC6         |
| 1.42 | -0.45 | DPY30         |
| 2.12 | -0.44 | PHF6          |
| 5.70 | -0.44 | CHD4          |
| 3.15 | -0.43 | NOLC1         |
| 2.35 | -0.43 | PNISR         |
| 2.12 | -0.42 | XRCC5         |
| 1.88 | -0.42 | RAD50         |
| 1.96 | -0.42 | EEF1G         |
| 1.57 | -0.41 | HNRNPAB       |
| 2.86 | -0.41 | MTA2          |
| 2.24 | -0.41 | HDAC1         |
| 3.35 | -0.41 | CDC73         |
| 3.47 | -0.41 | ADNP          |
| 3.36 | -0.39 | PRPF31        |
| 1.91 | -0.38 | RBBP7         |
| 1.67 | -0.37 | ANAPC7        |
| 1.76 | -0.37 | SF3A2         |
| 3.50 | -0.36 | MRTO4         |
| 2.94 | -0.36 | NUSAP1        |
| 1.83 | -0.36 | LEO1          |
| 2.52 | -0.35 | RPS15         |
| 3.33 | -0.35 | HCFC1         |
| 3.73 | -0.35 | SRP14         |
| 1.99 | -0.35 | ZBTB33        |
| 1.93 | -0.35 | HTATSF1       |
| 1.74 | -0.34 | PIP5K1A;PIPSL |

|      |       |          |
|------|-------|----------|
| 4.06 | -0.34 | MTA1     |
| 2.29 | -0.34 | RFC2     |
| 2.36 | -0.34 | TOX4     |
| 2.52 | -0.34 | NCBP1    |
| 2.48 | -0.34 | MKI67    |
| 1.81 | -0.34 | GATAD2B  |
| 1.82 | -0.34 | DDX5     |
| 2.05 | -0.33 | TRMT1L   |
| 2.34 | -0.33 | SART1    |
| 2.21 | -0.33 | SIN3B    |
| 2.00 | -0.33 | DDX23    |
| 2.67 | -0.32 | TBL2     |
| 2.01 | -0.32 | KIAA0020 |
| 2.21 | -0.31 | NOP16    |
| 2.82 | -0.31 | SNRPA1   |
| 3.10 | -0.31 | GRWD1    |
| 1.93 | -0.31 | SUDS3    |
| 1.96 | -0.31 | KPNA2    |
| 1.84 | -0.30 | RFC1     |
| 3.19 | -0.30 | SNRPB2   |
| 2.12 | -0.30 | SF3A3    |
| 1.89 | -0.29 | RFC3     |
| 2.36 | -0.29 | PRPF3    |
| 2.67 | -0.29 | RPS7     |
| 2.46 | -0.28 | ZC3H18   |
| 4.49 | -0.28 | BRD4     |
| 2.29 | -0.28 | TPR      |
| 2.84 | -0.28 | WDR43    |
| 2.23 | -0.27 | ALYREF   |
| 2.57 | -0.27 | BPTF     |
| 2.50 | -0.26 | SMARCB1  |
| 2.54 | -0.25 | WDR18    |
| 2.81 | -0.25 | CDC23    |
| 2.51 | -0.24 | CDK9     |
| 2.88 | -0.24 | ZCCHC8   |
| 4.75 | -0.24 | SF3A1    |
| 3.67 | -0.24 | OGT      |
| 2.89 | -0.23 | RPL9     |
| 4.50 | -0.22 | DIDO1    |

**Supp. Table 1: Overview of all significantly enriched putative RRM2 upstream regulators using CasID.**

**Table S2.**

| <b>Cell line</b> | <b>Origin</b> | <b>MYCN status</b> | <b>RRM2 status</b> |
|------------------|---------------|--------------------|--------------------|
| IMR-32           | Versteeg      | Amp                | N-Ampl             |
| CLB-GA           | Combaret      | N-Ampl             | N-Ampl             |
| SK-N-AS          | ATCC          | N-Ampl             | N-Ampl             |
| UKF-NB-3         | Speleman      | Amp                | No-information     |
| SK-N-FI          | Versteeg      | N-Ampl             | N-Ampl             |
| SK-N-BE2(c)      | Lunec         | Amp                | N-Ampl             |
| SH-EP            | Helen         | N-Ampl             | N-Ampl             |
| NB-1             | JHSF          | Amp                | N-Ampl             |
| SH-SY5Y          | Schulte       | N-Ampl             | Ampl               |
| N206             | Versteeg      | Amp                | Ampl               |
| NIH3T3           | Verfaillie    | -                  | -                  |

**Supp. Table 2: Cell lines origin (Amp: amplified; N-Ampl: Not-amplified).**

**Table S3.**

| <b>Products Tissue Culture</b>                | <b>Obtained</b>          |
|-----------------------------------------------|--------------------------|
| RPMI 1640 medium                              | Life Technologies Europe |
| Pen Strep                                     | ThermoFisher             |
| L- Glutamine                                  | ThermoFisher             |
| N-2,100X                                      | ThermoFisher             |
| B-27,50X                                      | ThermoFisher             |
| DMEM F-12 Glutamax                            | Life Technologies Europe |
| DMEM/F-12 (1:1)                               | Life Technologies Europe |
| DMEM                                          | Life Technologies Europe |
| B-mercaptoethanol                             | Sigma-Aldrich            |
| MEM non-essential amino acids Solution (100X) | Life Technologies Europe |
| hygromycin B                                  | Life Technologies Europe |
| CellTiter-Glo® reagent                        | Promega                  |
| 384-well plates                               | Corning                  |
| 96- well plates                               | Corning                  |
| T75 flask                                     | VWR                      |
| T25 flask                                     | VWR                      |
| PBS                                           | Life Technologies Europe |
| Zeocin                                        | Life Technologies Europe |
| blasticidin                                   | Sigma-Aldrich            |

|                                |               |
|--------------------------------|---------------|
| Accutase                       | Sigma-Aldrich |
| CellTiter-Glo 3D®              | Promega       |
| Caspase-Glo 3/7 Assay (10ml) ® | Promega       |
| EGF                            | PeptoTech     |
| FGF-2                          | PeptoTech     |
| PDGF-AA                        | PeptoTech     |
| PDGF-BB                        | PeptoTech     |
| IGF-1                          | R&D Systems   |

**Supp. Table 3: Cell culture products origin.**

**Table S4.**

| <b>Products Western blot</b>                    | <b>Obtained</b>              |
|-------------------------------------------------|------------------------------|
| phosphatase inhibitor mixture                   | Roche Molecular Biochemicals |
| Pierce™ BCA Protein Assay Kit                   | Life Technologies Europe     |
| β-mercaptoethanol                               | Sigma-Aldrich                |
| SDS-PAGE gels                                   | Pre-cast, Bio-Rad            |
| 10x Tris/glycine/SDS buffer                     | Biorad                       |
| nitrocellulose                                  | Biorad                       |
| Immun-Blot PVDF Membrane, 26 cm x 3.3 m, 1 roll | Biorad                       |
| Tris/Glycine buffer                             | Biorad                       |
| methanol                                        | Fisher Scientific            |
| BSA                                             | Sigma-Aldrich                |

**Supp. Table 4: Western blots products origin.**

**Table S5.**

| <b>Antibodies</b>                                              | <b>ID</b> | <b>Dilution</b> | <b>Obtained</b>           |
|----------------------------------------------------------------|-----------|-----------------|---------------------------|
| rabbit monoclonal antibody to RRM2 [EPR11820] (ab172476) 100µg | ab172476  | 1/2000          | Abcam (Netherlands) B.V.  |
| Phospho-Chk1 (Ser345) Antibody                                 | MA5-15145 | 1/1000          | Bioké BV                  |
| total CHK1 antibody                                            | sc-8408   | 1/1000          | Cell Signaling Technology |
| Anti-RPA32/RPA2 (phospho S33) antibody                         | ab211877  | 1/500           | Abcam (Netherlands) B.V.  |
| anti-RPA32 (total protein)                                     | ab2175    | 1/1000          | Abcam (Netherlands) B.V.  |



|                                                     |                      |         |                            |
|-----------------------------------------------------|----------------------|---------|----------------------------|
| rabbit polyclonal antibody to gamma H2A.X           | ab2893               | 1/2000  | Abcam (Netherlands) B.V.   |
| Monoclonal Anti-Vinculin antibody produced in mouse | V9131                | 1/10000 | Sigma-Aldrich              |
| ATR                                                 | 2790S                | 1/1000  | Cell Signaling Technology  |
| phospho-ATR                                         | 2853S                | 1/750   | Cell Signaling Technology  |
| DNA-PK                                              | ab168854             | 1/5000  | Abcam (Netherlands) B.V.   |
| phospho-DNA-PK                                      | ab18192              | 1/5000  | Abcam (Netherlands) B.V.   |
| mouse anti-BrdU, clone B44                          | 347580               | 1:100   | BD Benelux NV              |
| Rat monoclonal Anti-BrdU antibody [BU1/75 (ICR1)]   | ab6326               | 1:50    | Abcam (Netherlands) B.V.   |
| MYCN                                                | santa-cruz, sc-53993 | 1/2000  | Bio-Connect                |
| TH                                                  | P40101-150           | 1/5000  | Gentaur Molecular Products |
| GFP                                                 | #2956                | 1/400   | Cell Signalling, Bioké BV  |
| Phospho-Chk1 (Ser296) Antibody                      | #2349p               | 1/1000  | Cell Signaling Technology  |
| p-4E-BP1(Thr37/46)                                  | 9459                 | 1/50    | Bioké BV (NETHERLANDS)     |
| 4E-BP1 (53H11)                                      | 9644S                | 1/50    | Bioké BV (NETHERLANDS)     |

**Supp. Table 5: Western blots products origin.**

**Table S6.**

| Primers | Forward              | Reverse              |
|---------|----------------------|----------------------|
| RRM2    | AGGACATTCAGCACTGGGAA | CCATAGAAACAGCGGGCTTC |
| CDKN1A  | CCTCATCCCGTGTTCCTTT  | GTACCACCCAGCGGACAAGT |

|           |                                 |                            |
|-----------|---------------------------------|----------------------------|
| RRM2B     | CCTTGCATGGATAGCAGAT             | TCAGGCAAGCAAAGTCACAG       |
| BAX       | GATGCGTCCACCAAGAAGCT            | CGGCCCCAGTTGAAGTTG         |
| PUMA      | GCAGGCACCTAATTGGGCT             | ATCATGGGACTCCTGCCCTTA      |
| NOXA      | GCGCAAGAACGCTCAA                | G TTCAGTTTGTCTCCAAATCTC    |
| HEXIM1    | TGACTCCGAGGCCAGTAAGT            | GGCTCTGTTTCTCGTCGAAC       |
| Hprt_F_mm | TGCTCGAGATGTCATGAAGG            | TATGTCCCCGTTGACTGAT        |
| Ubc_F_mm  | GCAGATCTTTGTGAAGACCC            | GAAGGTACGTCTGTCTTCCT       |
| B2M       | TGCTGTCTCCATGTTTGATGTATCT       | TCTCTGCTCCCCACCTCTAAGT     |
| SDHA      | TGGGAACAAGAGGGCATCTG            | CCACCACTGCATCAAATTCATG     |
| TBP       | CACGAACCACGGCACTGATT            | TTTTCTTGCTGCCAGTCTGGAC     |
| YWHAZ     | ACTTTTGGTACATTGTGGCTTCAA        | CCGCCAGGACAAACCAGTAT       |
| Hatn10    | ACTAATGAAGACAGCAGAAGTCA         | CAGTAAACATGTCAGGCTAAATAAT  |
| Tdr7      | GCAGCATAATTGAGTACACCC           | TTGCCTATATTCAGTGAATGGA     |
| Loopern4  | TGAGCTGAACTTTACAGACACAT         | AGACTTTGGTGTCTCCAGAATG     |
| zRrm2     | TGTTTTACCAAACACTCCAAGC          | CGACTGCCCTCTGATTCAT        |
| hMYCN     | AGGACACCCTGAGCGATTCC            | AGGCATCGTTTGAGGATCAG       |
| zMycn     | AACAAGAGGGAGAATGCCAGC           | CCTCGTCCGGGTAGAAACAC       |
| eGFP      | GACCACATGAAGCAGCAC              | TTGTCGGCCATGATATAGAC       |
| mCherry   | CTGAAGGGCGAGATCAAGCA            | TAGTCCTCGTTGTTGGGAGGT      |
| TH        | GAACATGGCGGGAGGTCTAC            | GGCTGTAGCCGCAATGTTTC       |
| DBH       | GCAGCTTTTCTGGTGACT              | ACATGGGTATGGGGCTCTCT       |
| RRM2 -PCR | GGACGCGTATGGGAAGGGTCGGAGGCATGGC | TACCTTGGATGCTTCTAACATATGGA |

**Supp. Table 6: Primers design.**

**Table S7.**

| Cell lines   | 3AP      |          |          |
|--------------|----------|----------|----------|
|              | IC50     | IC30     | IC15     |
| IMR-32       | 689.5 nM | 295.5 nM | 122 nM   |
| CLB-GA       | 955.1 nM | 409.3 nM | 169 nM   |
| NIH3T3       | 928.5 nM | 397.9 nM | 163.9 nM |
| SK-N-BE(2)-C | 3200 nM  | 1372 nM  | 564 nM   |

**Supp. Table 7: IC50, 30 and 15 of 3AP for IMR-32, CLBGA, NIH3T3 and SK-N-BE-(2)C at 48 hours.****Table S8.**

| Zebrafish maintenance & generation of stable line | Obtained    |
|---------------------------------------------------|-------------|
| dbh:RRM2                                          | Invitrogen  |
| RRM2-pDONR221, n°GC-Z9335                         | Genecopoeia |

**Supp. Table 8: Origin of products used for zebrafish maintenance.****Table S9.**

| Generation of RRM2 Overexpression inducible cell line      | Obtained    |
|------------------------------------------------------------|-------------|
| Human RRM2, n° GC-Z9335-GS                                 | Genecopoeia |
| pLVX-TRE3G-Zsreen1 cat no: 631353                          | Takara      |
| Lenti-X 293T Cells, Cat no: 632180                         | Takara      |
| pLVX-pEF1a-Tet3G cat no: 631353                            |             |
| Lenti-X Packaging Single Shots (VSV-G) cat No. 631275      |             |
| <i>TetR monoclonal antibody (Clone 9G9) cat no. 631131</i> |             |

**Supp. Table 9: Origin of products used for plasmid construction.**
